# Supplementary material for: Challenges and facilitators for health professionals providing primary healthcare for refugees and asylum seekers in high-income countries: a systematic review and thematic synthesis of qualitative research
Source: PubMed Central journal article supplement (PMC5629684; doi:10.1136/bmjopen-2017-015981), 2017-08-04
Supplement: bmjopen-2017-015981supp001.pdf [file bmjopen-2017-015981supp001.pdf]

## Supplement 1: Database search strategy

| MEDLINE                                                                                                                                                                                                                                                                 | EMBASE                                                                                                                                                                                                                                                                 | CINAHL                                                                                                                                                                                                                                     | WEB OF SCIENCE                                                                                                                                                      | PSYCINFO                                                                                                                                                                                                                                                               |
|-------------------------------------------------------------------------------------------------------------------------------------------------------------------------------------------------------------------------------------------------------------------------|------------------------------------------------------------------------------------------------------------------------------------------------------------------------------------------------------------------------------------------------------------------------|--------------------------------------------------------------------------------------------------------------------------------------------------------------------------------------------------------------------------------------------|---------------------------------------------------------------------------------------------------------------------------------------------------------------------|------------------------------------------------------------------------------------------------------------------------------------------------------------------------------------------------------------------------------------------------------------------------|
| 1. refugee/<br>2. asylum Seek\$.mp.<br>3. refugee\$.mp.                                                                                                                                                                                                                 | 1. refugee/<br>2. asylum seeker/<br>3. asylum seek*.mp.<br>4. refugee*.mp.                                                                                                                                                                                             | 1. MH "Refugees"<br>2. "refugee**"<br>3. "asylum seek**"                                                                                                                                                                                   | 1. refugee*<br>2. asylum seek*                                                                                                                                      | 1. exp refugees/<br>2. asylum seek*.mp.<br>3. refugee*.mp.                                                                                                                                                                                                             |
| 4. 1 or 2 or 3                                                                                                                                                                                                                                                          | 5. 1 or 2 or 3 or 4                                                                                                                                                                                                                                                    | 4. 1 or 2 or 3                                                                                                                                                                                                                             | 3. 1 or 2                                                                                                                                                           | 4. 1 or 2 or 3                                                                                                                                                                                                                                                         |
| 5. exp Primary Healthcare/<br>6. exp health services/<br>7. exp health personnel/<br>8. nurs\$.mp.<br>9. pharmacist\$.mp.<br>10. health care.mp.<br>11. midwi\$.mp.<br>12. general practi\$.mp.<br>13. service provi\$.mp.<br>14. care prov\$.mp.<br>15. healthcare.mp. | 6. exp primary health care/<br>7. exp health service/<br>8. exp health care personnel/<br>9. healthcare.mp.<br>10. health care.mp.<br>11. nurs*.mp.<br>12. pharmacist*.mp.<br>13. midwi*.mp.<br>14. general practi*.mp.<br>15. service prov*.mp.<br>16. care prov*.mp. | 5. MH "Facilities Manpower and Services+"<br>6. MH "Health Personnel+"<br>7. "healthcare"<br>8. "health care"<br>9. "service prov**"<br>10. "care prov**"<br>11. "nurs**"<br>12. "pharmacist**"<br>13. "midwi**"<br>14. "general practi**" | 4. healthcare<br>5. health care<br>6. service prov*<br>7. care prov*<br>8. nurs*<br>9. pharmacist*<br>10. midwi*<br>11. general practi*                             | 5. exp Health Care Services/<br>6. exp primary health care/<br>7. exp Health Personnel/<br>8. health care.mp.<br>9. healthcare.mp.<br>10. care prov*.mp.<br>11. service prov*.mp.<br>12. nurs*.mp.<br>13. pharmacist*.mp.<br>14. midwi*.mp.<br>15. general practi*.mp. |
| 16. 5 or 6 or 7 or 8 or 9 or 10 or 11 or 12 or 13 or 14 or 15                                                                                                                                                                                                           | 17. 6 or 7 or 8 or 9 or 10 or 11 or 12 or 13 or 14 or 15 or 16                                                                                                                                                                                                         | 15. 5 or 6 or 7 or 8 or 9 or 10 or 11 or 12 or 13 or 14                                                                                                                                                                                    | 12. 4 or 5 or 6 or 7 or 8 or 9 or 10 or 11                                                                                                                          | 16. 5 or 6 or 7 or 8 or 9 or 10 or 11 or 12 or 13 or 14 or 15                                                                                                                                                                                                          |
| 17. qualitative.mp.<br>18. qualitative research/<br>19. mixed method\$.mp.<br>20. experienc\$.mp.<br>21. perception\$.mp.<br>22. attitude\$.mp.<br>23. Perspective\$.mp.<br>24. challenge\$.mp.<br>25. barrier\$.mp.<br>26. facilitator\$.mp.                           | 18. qualitative research/<br>19. qualitative.mp.<br>20. mixed method*.mp.<br>21. experienc*.mp.<br>22. perception*.mp.<br>23. attitude*.mp.<br>24. perspective*.mp.<br>25. challeng*.mp.<br>26. facilitator*.mp.<br>27. barrier*.mp.                                   | 16. MH "Qualitative Studies+"<br>17. "qualitative**"<br>18. "mixed method**"<br>19. "experienc**"<br>20. "perception**"<br>21. "attitude**"<br>22. "perspective**"<br>23. "challeng**"<br>24. "facilitator**"<br>25. "barrier**"           | 13. qualitative<br>14. mixed method*<br>15. experienc*<br>16. perception*<br>17. attitude*<br>18. perspective*<br>19. challeng*<br>20. facilitator*<br>21. barrier* | 17. exp Qualitative Research/<br>18. qualitative.mp.<br>19. mixed method*.mp.<br>20. experienc*.mp.<br>21. perception*.mp.<br>22. attitude*.mp.<br>23. perspective*.mp.<br>24. challeng*.mp.<br>25. facilitator*.mp.<br>26. barrier*.mp.                               |
| 27. 17 or 18 or 19 or 20 or 21 or 22 or 23 or 24 or 25 or 26                                                                                                                                                                                                            | 28. 18 or 19 or 20 or 21 or 22 or 23 or 24 or 25 or 26 or 27                                                                                                                                                                                                           | 26. 16 or 17 or 18 or 19 or 20 or 21 or 22 or 23 or 24 or 25                                                                                                                                                                               | 22. 13 or 14 or 15 or 16 or 17 or 18 or 19 or 20 or 21                                                                                                              | 27. 17 or 18 or 19 or 20 or 21 or 22 or 23 or 24 or 25 or 26                                                                                                                                                                                                           |
| 28. 4 and 16 and 27                                                                                                                                                                                                                                                     | 29. 5 and 17 and 28                                                                                                                                                                                                                                                    | 27. 4 and 15 and 26                                                                                                                                                                                                                        | 23. 3 and 12 and 22                                                                                                                                                 | 28. 4 and 16 and 27                                                                                                                                                                                                                                                    |
| <b>1377</b>                                                                                                                                                                                                                                                             | <b>1909</b>                                                                                                                                                                                                                                                            | <b>954</b>                                                                                                                                                                                                                                 | <b>875</b>                                                                                                                                                          | <b>855</b>                                                                                                                                                                                                                                                             |

|                                     |              |
|-------------------------------------|--------------|
| <b>Total from database searches</b> | <b>5,970</b> |
|-------------------------------------|--------------|
