# Supplementary material for: Challenges and facilitators for health professionals providing primary healthcare for refugees and asylum seekers in high-income countries: a systematic review and thematic synthesis of qualitative research
Source: PubMed Central journal article supplement (PMC5629684; doi:10.1136/bmjopen-2017-015981), 2017-08-04
Supplement: bmjopen-2017-015981supp002.pdf [file bmjopen-2017-015981supp002.pdf]

## Supplement 2: Selection criteria

### Study type:

| <b>Include</b>                                                                   | <b>Exclude</b>                                                                                                        |
|----------------------------------------------------------------------------------|-----------------------------------------------------------------------------------------------------------------------|
| Primary qualitative research studies<br>Interviews/focus groups<br>Peer reviewed | Theses/Dissertations<br>Opinion articles<br>Case studies<br>Surveys (quantitative)<br>Organisation reports<br>Reviews |

### Primary health care professionals:

| <b>Include</b>                                                                                 | <b>Exclude</b>                                                                                                                                                                                                                                         |
|------------------------------------------------------------------------------------------------|--------------------------------------------------------------------------------------------------------------------------------------------------------------------------------------------------------------------------------------------------------|
| Nurses<br>General practitioners<br>Midwives<br>Health visitors (nurse/midwives)<br>Pharmacists | Obstetricians<br>Psychologists<br>Psychotherapists<br>Physiotherapists<br>Counsellors<br>Social workers<br>Managers<br>Interpreters<br>Volunteers<br>Unqualified health professional (e.g student nurse)<br>Unspecified staff within service providers |

### Health care service users:

| <b>Include</b>                                                                | <b>Exclude</b>                                                      |
|-------------------------------------------------------------------------------|---------------------------------------------------------------------|
| Refugees<br>Asylum seekers<br>Forced/Involuntary migrants<br>Refugee claimant | Migrants<br>Immigrants<br>Undocumented migrant<br>Illegal immigrant |

### Setting of practice of health professionals:

| <b>Include</b>                                                                                            | <b>Exclude</b>                                                                                            |
|-----------------------------------------------------------------------------------------------------------|-----------------------------------------------------------------------------------------------------------|
| Community<br>Community health centres<br>General practices<br>Community clinics<br>Refugee/asylum centres | Asylum seeker detention centre<br>Hospitals- acute care<br>Specialist centres: referral from primary care |

High-income countries (World Bank classification 2015<sup>1</sup>):

Include:

|                     |                          |                           |
|---------------------|--------------------------|---------------------------|
| Andorra             | Guam                     | Saudi Arabia              |
| Antigua and Barbuda | Hong Kong SAR, China     | Seychelles                |
| Argentina           | Hungary                  | Singapore                 |
| Aruba               | Iceland                  | Sint Maarten (Dutch part) |
| Australia           | Ireland                  | Slovak Republic           |
| Austria             | Isle of Man              | Slovenia                  |
| Bahamas, The        | Israel                   | Spain                     |
| Bahrain             | Italy                    | St. Kitts and Nevis       |
| Barbados            | Japan                    | St. Martin (French part)  |
| Belgium             | Korea, Rep.              | Sweden                    |
| Bermuda             | Kuwait                   | Switzerland               |
| Brunei Darussalam   | Latvia                   | Taiwan, China             |
| Canada              | Liechtenstein            | Trinidad and Tobago       |
| Cayman Islands      | Lithuania                | Turks and Caicos Islands  |
| Channel Islands     | Luxembourg               | United Arab Emirates      |
| Chile               | Macao SAR, China         | United Kingdom            |
| Croatia             | Malta                    | United States             |
| Curaçao             | Monaco                   | Uruguay                   |
| Cyprus              | Netherlands              | Venezuela, RB             |
| Czech Republic      | New Caledonia            | Virgin Islands (U.S.)     |
| Denmark             | New Zealand              |                           |
| Equatorial Guinea   | Northern Mariana Islands |                           |
| Estonia             | Norway                   |                           |
| Faeroe Islands      | Oman                     |                           |
| Finland             | Poland                   |                           |
| France              | Portugal                 |                           |
| French Polynesia    | Puerto Rico              |                           |
| Germany             | Qatar                    |                           |
| Greece              | Russian Federation       |                           |
| Greenland           | San Marino               |                           |

Focus of study:

| <b>Include</b>                                                           | <b>Exclude</b>                                                                                                                                                                                                                                                                     |
|--------------------------------------------------------------------------|------------------------------------------------------------------------------------------------------------------------------------------------------------------------------------------------------------------------------------------------------------------------------------|
| Experiences providing primary healthcare for refugees and asylum seekers | Experiences treating a specific condition common in refugees and asylum seekers, but no focus on healthcare interactions.<br>Experiences of a particular service or organisation for refugees and asylum seekers<br>HCP's perspectives on refugees and asylum seekers' experiences |

---

<sup>1</sup> The World Bank, World Bank list of economies (July 2015) [Data file]. Retrieved from <http://data.worldbank.org/about/country-and-lending-groups>
